# Supplementary material for: What You Find Depends on How You Measure It: Reactivity of Response Scales Measuring Predecisional Information Distortion in Medical Diagnosis
Source: PubMed Central journal article supplement (PMC5023159; doi:10.1371/journal.pone.0162562), 2016-09-14
Supplement: pone.0162562.s006.pdf [file pone.0162562.s006.pdf]

**S5 Text. Data key: Variables in “S1\_Dataset.csv”**

**Primary variables:**

|                       |                                                                                                                                                                                                                                                                                                          |
|-----------------------|----------------------------------------------------------------------------------------------------------------------------------------------------------------------------------------------------------------------------------------------------------------------------------------------------------|
| <b>Physician</b>      | A physician identifier                                                                                                                                                                                                                                                                                   |
| <b>Group</b>          | Response-scale group <ul style="list-style-type: none"> <li>• 0: single-scale</li> <li>• 1: separate-scales</li> </ul>                                                                                                                                                                                   |
| <b>Scenario_Order</b> | <ul style="list-style-type: none"> <li>• 1 = scenario seen first</li> <li>• 2 = scenario seen second</li> </ul>                                                                                                                                                                                          |
| <b>Scenario</b>       | <ul style="list-style-type: none"> <li>• 0: dyspnea</li> <li>• 1: fatigue</li> </ul>                                                                                                                                                                                                                     |
| <b>Cue_Order</b>      | Order in which cues were presented <ul style="list-style-type: none"> <li>• 1 = first cue</li> <li>• 2 = second cue, etc.</li> </ul>                                                                                                                                                                     |
| <b>Proleader</b>      | A physician’s proleader distortion score for a given cue: <ul style="list-style-type: none"> <li>• single-scale: a physician’s distortion of a given cue (identical to antitrailer)</li> <li>• separate-scales: a physician’s distortion of a given cue in relation to the leading diagnosis</li> </ul>  |
| <b>Antitrailer</b>    | A physician’s antitrailer distortion score for a given cue: <ul style="list-style-type: none"> <li>• single-scale: a physician’s distortion of a given cue (identical to proleader)</li> <li>• separate-scales: a physician’s distortion of a given cue in relation to the trailing diagnosis</li> </ul> |
| <b>Verb_Lead</b>      | A physician’s verbal evaluation of a cue in relation to the leading diagnosis: <ul style="list-style-type: none"> <li>• 0: nothing</li> <li>• 1: unclear</li> <li>• 2: supportive</li> <li>• 3: non-supportive</li> </ul>                                                                                |
| <b>Verb_Trail</b>     | A physician’s verbal evaluation of a cue in relation to the trailing diagnosis: <ul style="list-style-type: none"> <li>• 0: nothing</li> <li>• 1: unclear</li> </ul>                                                                                                                                     |

|  |                                                                                                |
|--|------------------------------------------------------------------------------------------------|
|  | <ul style="list-style-type: none"> <li>• 2: supportive</li> <li>• 3: non-supportive</li> </ul> |
|--|------------------------------------------------------------------------------------------------|

The remaining variables are derived from “Verb\_Lead” and “Verb\_Trail”:

|                                 |                                                                                                                                                                                                                                                        |
|---------------------------------|--------------------------------------------------------------------------------------------------------------------------------------------------------------------------------------------------------------------------------------------------------|
| <b>Verb_Lead_Nothing</b>        | <p>Indicates whether a physician evaluated a cue in relation to the leading diagnosis:</p> <ul style="list-style-type: none"> <li>• 0: nothing</li> <li>• 1: other (unclear, supportive or non-supportive)</li> </ul>                                  |
| <b>Verb_Trail_Nothing</b>       | <p>Indicates whether a physician evaluated a cue in relation to the trailing diagnosis:</p> <ul style="list-style-type: none"> <li>• 0: nothing</li> <li>• 1: other (unclear, supportive or non-supportive)</li> </ul>                                 |
| <b>Verb_Lead_Supportive</b>     | <p>Indicates whether a physician’s verbal evaluation of a cue in relation to the leading diagnosis was supportive:</p> <ul style="list-style-type: none"> <li>• 0: other (nothing, unclear or non-supportive)</li> <li>• 1: supportive</li> </ul>      |
| <b>Verb_Trail_Nonsupportive</b> | <p>Indicates whether a physician’s verbal evaluation of a cue in relation to the trailing diagnosis was non-supportive:</p> <ul style="list-style-type: none"> <li>• 0: other (nothing, unclear or supportive)</li> <li>• 1: non-supportive</li> </ul> |
